# Supplementary material for: Ectopic Expression of OsJAZs Alters Plant Defense and Development
Source: Int J Mol Sci. 2022 Apr 21;23(9):4581. doi: 10.3390/ijms23094581 (PMC9103030; doi:10.3390/ijms23094581)
Supplement: Supplementary file 1 [file ijms-23-04581-s001.zip › Supplementary Tables S1-S3.xlsx]

## Sheet: Table S1
Table S1. List of primers used for vector construction.
Primer Name	Primer Sequence
	Forward (5' to 3')	Reverse (5' to 3')
OsJAZ1-F/R	CACCATGGATCTGTTGGAGAAGAAGA	GTACTGGGCCTTGCCCTCAG
OsJAZ3-F/R	CACCATGGAGAGGGATTTTCTTGG	CCATATCTGTAACTTTGTGCTGG
OsJAZ4-F/R	CACCATGGAGAGGGACTTCCTGGG	CCAGATTTGTAGCTTTGTACTGGG
OsJAZ4-1-F/R	CACCATGCCGTCGGCGCCGGTGGT	CCAGATTTGTAGCTTTGTACTGG
OsJAZ5-F/R	CACCATGTCGACGAGGGCGC	GTAGGACGCCGTGTGCTC
OsJAZ6-F/R	CACCATGGCTTCCGCGAAATC	CCATTGGCTCGATTCCTG
OsJAZ7-F/R	CACCATGGCGGCTTCCGCGAG	CCATTGGCCGCGTTCTATGG
OsJAZ8-F/R	CACCATGGCCGGCCGTGC	CCATATCTCCTGCTTTA
OsJAZ9-F/R	CACCATGGCGTCGACGGATCC	CCAGCGCGAGTGCATGTG
OsJAZ10-F/R	CACCATGGCGATGGAGGGGAG	CCACAGCGCGATGGTGA
OsJAZ11-F/R	CACCATGGCCGGTAGTAGCGAGC	CCACAGGCTGAGAGTGGGGT
OsJAZ12-F/R	CACCATGGCCGCCGCCGG	CCAGAGCCCGAGCCATGTCG
OsJAZ13-F/R	CACCATGGCGGCGGAGGC	CCAGAGCGCGAGCGC
OsJAZ6-BIFC-F/R	TGCTCTAGAATGGCTTCCGCGAAATCCG	CGGGATCCCCATTGGCTCGATTCCTGCC
OsJAZ7-BIFC-F/R	TGCTCTAGAATGGCGGCTTCCGCG	CGGGATCCCCATTGGCCGCGTTCTATGG
OsJAZ8-BIFC-F/R	TGCTCTAGAATGGCGTCGACGGATCC	GGGGTACCTCAGCGCGAGTGCATGTG
OsJAZ9-BIFC-F/R	TGCTCTAGAATGGCCGGTAGTAGCGAGC	CGGGATCCCCACAGGCTGAGAGTGGGGT
OsJAZ10-BIFC-F/R	TCCCCCGGGGACTGATTACCGGCTACAACCAAC	CGCGGATCCTTAACCGATTTTTGAAATCAAACTTGCTCTGA
OsJAZ11-BIFC-F/R	TCCCCCGGGGAAGAGAGATCATCATC	CGCGGATCCCTAATTGGTGGAGAGTTTCCAAGCC
OsJAZ12-BIFC-F/R	TCCCCCGGGGAAGAGAGATCATCACCAATTCCAAGG	CGCGGATCCTCAGTACGCCGCCGTCGA

## Sheet: Table S2
Table S2. List of primers used for qRT-PCR analysis.
Gene Name	Accession Numbers	Primer Sequence
		Forward (5' to 3')	Reverse (5' to 3')
AtFT	AT1G65480	AGAGTTGAGATTGGTGGAGAAG	CCAAAGGTTGTTCCAGTTGTAG
AtPDF1.2	AT5G44420	CTTATCTTCGCTGCTCTTGTTC	TGGGAAGACATAGTTGCATGAT
AtPR1	AT2G14610	TGGTCACTACACTCAAGTTGTT	GCTTCTCGTTCACATAATTCCC
ACTIN2	AT3G18780	AGTGGTCGTACAACCGGTATTGT	GATGGCATGAGGAAGAGAGAAAC

## Sheet: Table S3
Table S3. List of overexpressing plants and corresponding accession numbers.
Overexpressing Plant	Gene Name	Accession Numbers	Species
AtJAZ1 OE	AtJAZ1	AT1G19180	Arabidopsis thaliana
AtJAZ2 OE	AtJAZ2	AT1G74950	Arabidopsis thaliana
AtJAZ3 OE	AtJAZ3	AT3G17860	Arabidopsis thaliana
AtJAZ4 OE	AtJAZ4	AT1G48500	Arabidopsis thaliana
AtJAZ5 OE	AtJAZ5	AT1G17380	Arabidopsis thaliana
AtJAZ6 OE	AtJAZ6	AT1G72450	Arabidopsis thaliana
AtJAZ7 OE	AtJAZ7	AT2G34600	Arabidopsis thaliana
AtJAZ8 OE	AtJAZ8	AT1G30135	Arabidopsis thaliana
AtJAZ9 OE	AtJAZ9	AT1G70700	Arabidopsis thaliana
AtJAZ10 OE	AtJAZ10	AT5G13220	Arabidopsis thaliana
AtJAZ11 OE	AtJAZ11	AT3G43440	Arabidopsis thaliana
AtJAZ12 OE	AtJAZ12	AT5G20900	Arabidopsis thaliana
OsJAZ1 OE	OsJAZ1	LOC_Os04g55920.1	Oryza sativa
OsJAZ3 OE	OsJAZ3	LOC_Os08g33160.1	Oryza sativa
OsJAZ4 OE	OsJAZ4	LOC_Os09g23660.1	Oryza sativa
OsJAZ4-1 OE	OsJAZ4-1	LOC_Os09g23660.2	Oryza sativa
OsJAZ5 OE	OsJAZ5	LOC_Os04g32480.1	Oryza sativa
OsJAZ6 OE	OsJAZ6	LOC_Os03g28940.1	Oryza sativa
OsJAZ7 OE	OsJAZ7	LOC_Os07g42370.1	Oryza sativa
OsJAZ8 OE	OsJAZ8	LOC_Os09g26780.1	Oryza sativa
OsJAZ9 OE	OsJAZ9	LOC_Os03g08310.1	Oryza sativa
OsJAZ10 OE	OsJAZ10	LOC_Os03g08330.1	Oryza sativa
OsJAZ11 OE	OsJAZ11	LOC_Os03g08320.1	Oryza sativa
OsJAZ12 OE	OsJAZ12	LOC_Os10g25290.1	Oryza sativa
OsJAZ13 OE	OsJAZ13	LOC_Os10g25230.1	Oryza sativa
